# Supplementary material for: Genetic Variation and Hybridisation among Eight Species of kōwhai (Sophora: Fabaceae) from New Zealand Revealed by Microsatellite Markers
Source: Genes (Basel). 2018 Feb 20;9(2):111. doi: 10.3390/genes9020111 (PMC5852607; doi:10.3390/genes9020111)
Supplement: Supplementary file 1 [file genes-09-00111-s001.xlsx]

## Sheet: nz sp
Table S1: Samples used for the study.
Sample no.	Species	Voucher
3	S. chathamica	CHR 529907
5	S. chathamica	CHR 529909
6	S. chathamica	CHR 529911
7	S. chathamica	CHR 529912
8	S. chathamica	CHR 529913
96	S. chathamica	CHR 617297
97	S. chathamica	CHR 517162
98	S. chathamica	CHR 553650
99	S. chathamica	CHR 554058
100	S. chathamica	CHR 493833
172	S. chathamica	CHR 553674
176	S. chathamica	CHR 553874
177	S. chathamica	CHR 553867
178	S. chathamica	CHR 553873
179	S. chathamica	CHR 553885
180	S. chathamica	CHR 553875
181	S. chathamica	CHR 553887
182	S. chathamica	CHR 554059
183	S. chathamica	CHR 553886
185	S. chathamica	CHR 517124
186	S. chathamica	CHR 517127
187	S. chathamica	CHR 517125
188	S. chathamica	CHR 553889
190	S. chathamica	CHR 554078
191	S. chathamica	CHR 493076A
192	S. chathamica	CHR 553089
194	S. chathamica	CHR 546878B
195	S. chathamica	CHR 546878A
198	S. chathamica	CHR 517107B
199	S. chathamica	CHR 517104A
200	S. chathamica	CHR 517104B
201	S. chathamica	CHR 554077
202	S. chathamica	CHR 553097
203	S. chathamica	CHR 553085
204	S. chathamica	CHR 553101
205	S. chathamica	CHR 553102
206	S. chathamica	CHR 517111
207	S. chathamica	CHR 517103
208	S. chathamica	CHR 517114
209	S. chathamica	CHR 517110A
211	S. chathamica	CHR 517113
212	S. chathamica	CHR 517116
213	S. chathamica	CHR 517115
214	S. chathamica	CHR 517132A
216	S. chathamica	CHR 550675
219	S. chathamica	CHR 550674
220	S. chathamica	CHR 546230
221	S. chathamica	CHR 517131
222	S. chathamica	CHR 527630
224	S. chathamica	CHR 517130
225	S. chathamica	CHR 527641
226	S. chathamica	CHR 517665A
228	S. chathamica	CHR 493849
229	S. chathamica	CHR 525852
230	S. chathamica	CHR 515557A
232	S. chathamica	CHR 546876A
233	S. chathamica	CHR 546876B
234	S. chathamica	CHR 553082
235	S. chathamica	CHR 493850
236	S. chathamica	CHR 493841
237	S. chathamica	CHR 546381A
239	S. chathamica	CHR 609606A
241	S. chathamica	CHR 594777
648	S. chathamica	CHR 40674
649	S. chathamica	CHR 111263
822	S. chathamica	CHR 178155
823	S. chathamica	CHR 178154
824	S. chathamica	CHR 194478
826	S. chathamica	CHR 171654
827	S. chathamica	CHR 513393 A
828	S. chathamica	CHR 513393 B
829	S. chathamica	CHR 513390 A
832	S. chathamica	CHR 365033 B
833	S. chathamica	CHR 365033 C
834	S. chathamica	CHR 513391 A
835	S. chathamica	CHR 513391 B
837	S. chathamica	CHR 285423
840	S. chathamica	CHR 553581
841	S. chathamica	CHR 276048
845	S. chathamica	CHR 553888
846	S. chathamica	CHR 225466
848	S. chathamica	CHR 546888 A
850	S. chathamica	CHR 552435 A
852	S. chathamica	CHR 552435 C
853	S. chathamica	CHR 553090
854	S. chathamica	CHR 513373
855	S. chathamica	CHR 513385
860	S. chathamica	CHR 493830
865	S. chathamica	CHR 517126 A
870	S. chathamica	CHR 194456
871	S. chathamica	CHR 245664
888	S. chathamica	CHR 323929
9	S. fulvida	CHR 529914
10	S. fulvida	CHR 529915
11	S. fulvida	CHR 529916
12	S. fulvida	CHR 529918
13	S. fulvida	CHR 529919
89	S. fulvida	CHR 493072
90	S. fulvida	CHR 513392
91	S. fulvida	CHR 512965C
92	S. fulvida	CHR 546260
93	S. fulvida	CHR 513375
95	S. fulvida	CHR 512968
259	S. fulvida	CHR 512969
262	S. fulvida	CHR 115318
267	S. fulvida	CHR 140659
268	S. fulvida	CHR 205151
269	S. fulvida	CHR 107817
270	S. fulvida	CHR 127225
271	S. fulvida	CHR 127226
272	S. fulvida	CHR 513376A
275	S. fulvida	CHR 513376D
276	S. fulvida	CHR 513387A
277	S. fulvida	CHR 513387B
279	S. fulvida	CHR 512959A
280	S. fulvida	CHR 513378
281	S. fulvida	CHR 193144
282	S. fulvida	CHR 296606
283	S. fulvida	CHR 513386A
285	S. fulvida	CHR 513386C
286	S. fulvida	CHR 513386D
287	S. fulvida	CHR 513374A
288	S. fulvida	CHR 513374B
289	S. fulvida	CHR 8212
290	S. fulvida	CHR 8238
291	S. fulvida	CHR 89139
293	S. fulvida	CHR 546280
294	S. fulvida	CHR 213217
296	S. fulvida	CHR 354489C
297	S. fulvida	CHR 354489D
298	S. fulvida	CHR 285939
300	S. fulvida	CHR 354489B
301	S. fulvida	CHR 512965A
303	S. fulvida	CHR 497845
304	S. fulvida	CHR 512964
305	S. fulvida	CHR 512966A
307	S. fulvida	CHR 512966C
308	S. fulvida	CHR 512966D
309	S. fulvida	CHR 8164
310	S. fulvida	CHR 8979
315	S. fulvida	CHR 225417
316	S. fulvida	CHR 225418
317	S. fulvida	CHR 513397A
319	S. fulvida	CHR 512963A
320	S. fulvida	CHR 512963B
321	S. fulvida	CHR 512962
322	S. fulvida	CHR 513396
323	S. fulvida	CHR 513389
324	S. fulvida	CHR 553583
14	S. godleyi	CHR 515548
15	S. godleyi	CHR 529920
16	S. godleyi	CHR 529921
17	S. godleyi	CHR 529922
18	S. godleyi	CHR 515554
19	S. godleyi	CHR 515553
85	S. godleyi	CHR 517171
86	S. godleyi	CHR 517163
87	S. godleyi	CHR 517173
88	S. godleyi	CHR 515564
326	S. godleyi	CHR 517168
327	S. godleyi	CHR 517170
328	S. godleyi	CHR 517169
329	S. godleyi	CHR 517172
330	S. godleyi	CHR 517650
331	S. godleyi	CHR 517651A
332	S. godleyi	CHR 517651B
333	S. godleyi	CHR 517785A
334	S. godleyi	CHR 517785B
335	S. godleyi	CHR 517649A
336	S. godleyi	CHR 525411A
338	S. godleyi	CHR 550919
339	S. godleyi	CHR 515565
340	S. godleyi	CHR 515568
341	S. godleyi	CHR 515566
342	S. godleyi	CHR 517187
343	S. godleyi	CHR 517181
344	S. godleyi	CHR 517180
345	S. godleyi	CHR 517179
346	S. godleyi	CHR 517182
347	S. godleyi	CHR 517165
348	S. godleyi	CHR 517166
349	S. godleyi	CHR 517167
350	S. godleyi	CHR 515563
351	S. godleyi	CHR 515571
352	S. godleyi	CHR 515570
358	S. godleyi	CHR 517191
359	S. godleyi	CHR 526015 A
360	S. godleyi	CHR 526015 B
361	S. godleyi	CHR 526016 A
362	S. godleyi	CHR 526016 B
363	S. godleyi	CHR 517147
364	S. godleyi	CHR 517149
365	S. godleyi	CHR 517146
367	S. godleyi	CHR 517139 A
368	S. godleyi	CHR 517139 B
369	S. godleyi	CHR 517144
371	S. godleyi	CHR 517153
372	S. godleyi	CHR 517136
373	S. godleyi	CHR 517154
374	S. godleyi	CHR 517155
375	S. godleyi	CHR 517156
376	S. godleyi	CHR 517160
377	S. godleyi	CHR 517161
379	S. godleyi	CHR 517150
20	S. longicarinata	CHR 529925
21	S. longicarinata	CHR 529927
22	S. longicarinata	CHR 529928
78	S. longicarinata	CHR 285476A
79	S. longicarinata	CHR 285477
80	S. longicarinata	CHR 274510
81	S. longicarinata	CHR 325579
82	S. longicarinata	CHR 616349
83	S. longicarinata	CHR 617025
84	S. longicarinata	CHR 550516
394	S. longicarinata	CHR 115299
396	S. longicarinata	CHR 285475
397	S. longicarinata	CHR 285480
398	S. longicarinata	CHR 511673
399	S. longicarinata	CHR 506487
402	S. longicarinata	CHR 285477
404	S. longicarinata	CHR 512508
405	S. longicarinata	CHR 512507
406	S. longicarinata	CHR 117104
407	S. longicarinata	CHR 285478
408	S. longicarinata	CHR 285476 A
409	S. longicarinata	CHR 285476
410	S. longicarinata	CHR 506496
412	S. longicarinata	CHR 512506
418	S. longicarinata	CHR 617021
419	S. longicarinata	CHR 633249
420	S. longicarinata	CHR 633248
24	S. microphylla	CHR 529932
25	S. microphylla	CHR 529933
26	S. microphylla	CHR 529934
27	S. microphylla	CHR 529935
28	S. microphylla	CHR 529939
29	S. microphylla	CHR 529941
30	S. microphylla	CHR 529942
31	S. microphylla	CHR 529943
32	S. microphylla	CHR 529944
33	S. microphylla	CHR 529945
34	S. microphylla	CHR 529946
35	S. microphylla	CHR 529947
36	S. microphylla	CHR 529948
37	S. microphylla	CHR 529949
38	S. microphylla	CHR 529950
52	S. microphylla	CHR 577128
53	S. microphylla	CHR 225568
54	S. microphylla	CHR 515567
55	S. microphylla	CHR 529929
632	S. microphylla	CHR 593944
836	S. microphylla	CHR 185581
842	S. microphylla	CHR 186933
847	S. microphylla	CHR 553103
856	S. microphylla	CHR 185876
857	S. microphylla	CHR 517106
858	S. microphylla	CHR 517112
861	S. microphylla	CHR 493828
863	S. microphylla	CHR 191520 B
867	S. microphylla	CHR 512957
868	S. microphylla	CHR 325568
872	S. microphylla	CHR 517129
873	S. microphylla	CHR 527631
874	S. microphylla	CHR 191474
875	S. microphylla	CHR 246157
876	S. microphylla	CHR 262081
879	S. microphylla	CHR 209745
880	S. microphylla	CHR 231778
881	S. microphylla	CHR 525525
882	S. microphylla	CHR 515567
883	S. microphylla	CHR 515569
884	S. microphylla	CHR 517184
885	S. microphylla	CHR 517148
886	S. microphylla	CHR 517158
889	S. microphylla	CHR 129973
890	S. microphylla	CHR 517659
891	S. microphylla	CHR 517658
893	S. microphylla	CHR 517142
894	S. microphylla	CHR 517145
895	S. microphylla	CHR 517141
896	S. microphylla	CHR 517138
897	S. microphylla	CHR 517133
898	S. microphylla	CHR 282726
899	S. microphylla	CHR 182759
900	S. microphylla	CHR 517177
901	S. microphylla	CHR 517174 A
903	S. microphylla	CHR 209613
904	S. microphylla	CHR 209673
905	S. microphylla	CHR 515576
906	S. microphylla	CHR 273054
907	S. microphylla	CHR 159916
908	S. microphylla	158821 A
909	S. microphylla	158821 B
910	S. microphylla	CHR 420134
913	S. microphylla	CHR 517617
914	S. microphylla	CHR 517621
915	S. microphylla	CHR 158943
916	S. microphylla	CHR 517616
917	S. microphylla	CHR 197369
918	S. microphylla	CHR 474968
919	S. microphylla	CHR 358238
920	S. microphylla	CHR 191519
921	S. microphylla	CHR 149382
922	S. microphylla	CHR 185866
923	S. microphylla	CHR 419809
927	S. microphylla	CHR 229283
928	S. microphylla	CHR 185664 A
930	S. microphylla	CHR 229856 A
931	S. microphylla	CHR 229856 B
932	S. microphylla	CHR 285415 A
934	S. microphylla	CHR 230184
935	S. microphylla	CHR 245282
936	S. microphylla	CHR 219747
937	S. microphylla	CHR 118050
939	S. microphylla	CHR 506486
941	S. microphylla	CHR 185880 A
943	S. microphylla	CHR 365021
944	S. microphylla	CHR 323023
946	S. microphylla	CHR 280249
949	S. microphylla	CHR 117500
950	S. microphylla	CHR 285434
952	S. microphylla	CHR 285432
953	S. microphylla	CHR 88774
954	S. microphylla	CHR 229897
956	S. microphylla	CHR 191517
957	S. microphylla	CHR 285435
959	S. microphylla	CHR 479953
961	S. microphylla	CHR 251909
962	S. microphylla	CHR 191482
963	S. microphylla	CHR 502932
964	S. microphylla	CHR 607517
965	S. microphylla	CHR 617027
966	S. microphylla	CHR 218320
967	S. microphylla	CHR 607827
968	S. microphylla	CHR 191304
969	S. microphylla	CHR 118054
970	S. microphylla	CHR 324866
971	S. microphylla	CHR 465466 A
972	S. microphylla	CHR 465466 B
979	S. microphylla	CHR 285420
980	S. microphylla	CHR 617028
981	S. microphylla	CHR 191212
982	S. microphylla	CHR 567731 B
983	S. microphylla	CHR 191301
984	S. microphylla	CHR 191383
985	S. microphylla	CHR 191384
986	S. microphylla	CHR 252888
987	S. microphylla	CHR 79125
988	S. microphylla	CHR 194422
989	S. microphylla	CHR 212875
992	S. microphylla	CHR 617033
993	S. microphylla	CHR 191316
994	S. microphylla	CHR 229935
995	S. microphylla	CHR 256526
996	S. microphylla	CHR 617036
997	S. microphylla	CHR 617029
999	S. microphylla	CHR 261207
1000	S. microphylla	CHR 285455
1001	S. microphylla	CHR 191317
1003	S. microphylla	CHR 177711
1005	S. microphylla	CHR 238922
1006	S. microphylla	CHR 366616
1007	S. microphylla	CHR 463698
1008	S. microphylla	CHR 617041
1009	S. microphylla	CHR 617040
1010	S. microphylla	CHR 508680 A
1011	S. microphylla	CHR 508680 B
1013	S. microphylla	CHR 527135
1014	S. microphylla	CHR 617038
1015	S. microphylla	CHR 285431
1016	S. microphylla	CHR 238286
1017	S. microphylla	CHR 593914
1018	S. microphylla	CHR 225313
1019	S. microphylla	CHR 229891
1021	S. microphylla	CHR 78411
1022	S. microphylla	CHR 509479 A
1023	S. microphylla	CHR 509479 B
1025	S. microphylla	CHR 609605
1026	S. microphylla	CHR 604802
39	S. molloyi	CHR 529951
40	S. molloyi	CHR 529953
56	S. molloyi	CHR 524704
57	S. molloyi	CHR 517662
58	S. molloyi	CHR 517663
59	S. molloyi	CHR 617233
481	S. molloyi	CHR 533012
483	S. molloyi	CHR 517664
484	S. molloyi	CHR 517797
485	S. molloyi	CHR 493073
486	S. molloyi	CHR 493075
487	S. molloyi	CHR 493099
912	S. molloyi	CHR 474964
925	S. molloyi	CHR 317790
926	S. molloyi	CHR 188730
41	S. prostrata	CHR 529955
42	S. prostrata	CHR 529956
43	S. prostrata	CHR 529957
48	S. prostrata	CHR 554366
49	S. prostrata	CHR 554367
73	S. prostrata	CHR 617026
74	S. prostrata	CHR 279372
75	S. prostrata	CHR 516878
76	S. prostrata	CHR 564663
488	S. prostrata	CHR 194469
489	S. prostrata	CHR 194472
490	S. prostrata	CHR 194471
491	S. prostrata	CHR 77883
492	S. prostrata	CHR 311872
493	S. prostrata	CHR 194470
494	S. prostrata	CHR 325570
495	S. prostrata	CHR 279902
497	S. prostrata	CHR 147520
498	S. prostrata	CHR 279903
499	S. prostrata	CHR 325575
500	S. prostrata	CHR 73678
501	S. prostrata	CHR 107816
502	S. prostrata	CHR 107815
503	S. prostrata	CHR 84613
504	S. prostrata	CHR 185868
505	S. prostrata	CHR 185867
506	S. prostrata	CHR 296605
507	S. prostrata	CHR 279371
508	S. prostrata	CHR 211932
509	S. prostrata	CHR 277511
510	S. prostrata	CHR 279376
512	S. prostrata	CHR 211930
513	S. prostrata	CHR 85316
514	S. prostrata	CHR 229956
515	S. prostrata	CHR 325563
517	S. prostrata	CHR 279264
518	S. prostrata	CHR 387580
519	S. prostrata	CHR 325572
520	S. prostrata	CHR 285449
521	S. prostrata	CHR 309410
522	S. prostrata	CHR 474028
523	S. prostrata	CHR 356361
524	S. prostrata	CHR 527066
525	S. prostrata	CHR 176751
526	S. prostrata	CHR 252602
528	S. prostrata	CHR 107811
531	S. prostrata	CHR 290193
532	S. prostrata	CHR 107814
533	S. prostrata	CHR 107813
534	S. prostrata	CHR 107810
535	S. prostrata	CHR 191274
538	S. prostrata	CHR 191434
539	S. prostrata	CHR 229852
540	S. prostrata	CHR 348055
541	S. prostrata	CHR 229898
542	S. prostrata	CHR 366619 A
544	S. prostrata	CHR 366619 C
547	S. prostrata	CHR 366619 F
548	S. prostrata	CHR 356619
549	S. prostrata	CHR 126723
552	S. prostrata	CHR 189366
553	S. prostrata	CHR 522595
554	S. prostrata	CHR 302149
555	S. prostrata	CHR 229958
556	S. prostrata	CHR 191216 A
557	S. prostrata	CHR 191216 B
558	S. prostrata	CHR 191215
559	S. prostrata	CHR 191485
561	S. prostrata	CHR 191281
569	S. prostrata	CHR 194398 A
570	S. prostrata	CHR 194398 B
571	S. prostrata	CHR 194446
573	S. prostrata	CHR 94035
575	S. prostrata	CHR 285310 A
577	S. prostrata	CHR 169431
578	S. prostrata	CHR 191306
580	S. prostrata	CHR 191480
582	S. prostrata	CHR 617039
583	S. prostrata	CHR 169101
586	S. prostrata	CHR 573321
588	S. prostrata	CHR 607894
589	S. prostrata	CHR 607899
590	S. prostrata	CHR 607898
591	S. prostrata	CHR 607897
592	S. prostrata	CHR 607896
593	S. prostrata	CHR 607895
594	S. prostrata	CHR 478779
595	S. prostrata	CHR 255299
596	S. prostrata	CHR 191285
600	S. prostrata	CHR 155402
601	S. prostrata	CHR 391179
602	S. prostrata	CHR 174291
603	S. prostrata	CHR 574338 A
604	S. prostrata	CHR 574338 B
605	S. prostrata	CHR 574339 A
606	S. prostrata	CHR 574339 B
608	S. prostrata	CHR 386128
609	S. prostrata	CHR 212209
610	S. prostrata	CHR 212208
611	S. prostrata	CHR 574340A
613	S. prostrata	CHR 194424
615	S. prostrata	CHR 194930
616	S. prostrata	CHR 194425
617	S. prostrata	CHR 194915
618	S. prostrata	CHR 194929
619	S. prostrata	CHR 617035
620	S. prostrata	CHR 437869
623	S. prostrata	CHR 483321
625	S. prostrata	CHR 191386
626	S. prostrata	CHR 18635
627	S. prostrata	CHR 191396
628	S. prostrata	CHR 191397
629	S. prostrata	CHR 285479
630	S. prostrata	CHR 176682
631	S. prostrata	CHR 221875
23	S. rnicrophylla	CHR 529931
60	S. tetraptera	CHR 517657
61	S. tetraptera	CHR 517620
62	S. tetraptera	CHR 517625
63	S. tetraptera	CHR 517613
64	S. tetraptera	CHR 274955
65	S. tetraptera	CHR 515574
66	S. tetraptera	CHR 282735
67	S. tetraptera	CHR 236628
68	S. tetraptera	CHR 236873
69	S. tetraptera	CHR 191322
70	S. tetraptera	CHR 554048
71	S. tetraptera	CHR 156602
72	S. tetraptera	CHR 554039
642	S. tetraptera	CHR 554052
643	S. tetraptera	CHR 554045
644	S. tetraptera	CHR 554047
645	S. tetraptera	CHR 554046
646	S. tetraptera	CHR 554053
647	S. tetraptera	CHR 554050
650	S. tetraptera	CHR 144326
651	S. tetraptera	CHR 171653
652	S. tetraptera	CHR 296536
653	S. tetraptera	CHR 115300
654	S. tetraptera	CHR 315780
655	S. tetraptera	CHR 258999
656	S. tetraptera	CHR 553080
657	S. tetraptera	CHR 282606
658	S. tetraptera	CHR 229878 A
660	S. tetraptera	CHR 229875
661	S. tetraptera	CHR 229877
662	S. tetraptera	CHR 229876
663	S. tetraptera	CHR 282607
664	S. tetraptera	CHR 553081
667	S. tetraptera	CHR 236629
669	S. tetraptera	CHR 229873
670	S. tetraptera	CHR 258989 A
671	S. tetraptera	CHR 258989 B
672	S. tetraptera	CHR 480358
673	S. tetraptera	CHR 115306
674	S. tetraptera	CHR 115307
675	S. tetraptera	CHR 115308
676	S. tetraptera	CHR 325499
677	S. tetraptera	CHR 82918
678	S. tetraptera	CHR 115304
679	S. tetraptera	CHR 115305
680	S. tetraptera	CHR 112532
681	S. tetraptera	CHR 553897
682	S. tetraptera	CHR 553898
683	S. tetraptera	CHR 245873
684	S. tetraptera	CHR 478862
685	S. tetraptera	CHR 607389 A
686	S. tetraptera	CHR 607389 B
687	S. tetraptera	CHR 517530
688	S. tetraptera	CHR 231774
689	S. tetraptera	CHR 191321
690	S. tetraptera	CHR 191320
691	S. tetraptera	CHR 191319
692	S. tetraptera	CHR 216966
693	S. tetraptera	CHR 236872
695	S. tetraptera	CHR 191318
696	S. tetraptera	CHR 296581
698	S. tetraptera	CHR 517546
699	S. tetraptera	CHR 563197
700	S. tetraptera	CHR 191323
701	S. tetraptera	CHR 191325
702	S. tetraptera	CHR 191326
703	S. tetraptera	CHR 231777
704	S. tetraptera	CHR 231776
705	S. tetraptera	CHR 236874
706	S. tetraptera	CHR 236879
707	S. tetraptera	CHR 233351
708	S. tetraptera	CHR 262055
709	S. tetraptera	CHR 262056
710	S. tetraptera	CHR 191296 A
711	S. tetraptera	CHR 191296 B
712	S. tetraptera	CHR 208673
713	S. tetraptera	CHR 315826
715	S. tetraptera	CHR 236631
716	S. tetraptera	CHR 152747
717	S. tetraptera	CHR 157346
718	S. tetraptera	CHR 229874
719	S. tetraptera	CHR 615087
720	S. tetraptera	CHR 367199
721	S. tetraptera	CHR 367200
722	S. tetraptera	CHR 367201
724	S. tetraptera	CHR 367197
728	S. tetraptera	CHR 517143
729	S. tetraptera	CHR 74400
730	S. tetraptera	CHR 315841
731	S. tetraptera	CHR 315840
732	S. tetraptera	CHR 29554
734	S. tetraptera	CHR 191295
735	S. tetraptera	CHR 517653
736	S. tetraptera	CHR 517655
737	S. tetraptera	CHR 159917
740	S. tetraptera	CHR 21231
741	S. tetraptera	CHR 159294
742	S. tetraptera	CHR 33854 A
743	S. tetraptera	CHR 159290
747	S. tetraptera	CHR 191298
748	S. tetraptera	CHR 315708
749	S. tetraptera	CHR 497790 A
751	S. tetraptera	CHR 517623
752	S. tetraptera	CHR 517626
753	S. tetraptera	CHR 191297 A
754	S. tetraptera	CHR 191297 B
755	S. tetraptera	CHR 158615
756	S. tetraptera	CHR 51244
757	S. tetraptera	CHR 51243
758	S. tetraptera	CHR 377194
760	S. tetraptera	CHR 159205
761	S. tetraptera	CHR 185862
764	S. tetraptera	CHR 517667
877	S. tetraptera	CHR 546357 A
878	S. tetraptera	CHR 546357 B
892	S. tetraptera	CHR 517652
